# Supplementary material for: Regional radiomics similarity networks (R2SNs) in the human brain: Reproducibility, small-world properties and a biological basis
Source: PubMed Central journal article supplement (PMC8567836; doi:10.1162/netn_a_00200), 2021-08-30
Supplement: netn-05-783-s001.pdf [file netn-05-783-s001.pdf]

## **Regional radiomics similarity networks (R2SN) in the human brain: reproducibility, small-world and biological basis**

### **Outline**

|                                                                                           |    |
|-------------------------------------------------------------------------------------------|----|
| S01: Definitions of the radiomics features.....                                           | 2  |
| 1. Intensity features .....                                                               | 2  |
| 2. Textural features .....                                                                | 4  |
| S02: Supplementary method for R2SN construction .....                                     | 7  |
| S03: Supplementary results for the replicability of the result in Brainnetome Atlas ..... | 8  |
| References.....                                                                           | 18 |

## S01: Definitions of the radiomics features

A total of 47 MRI imaging features, including intensity and textural features, were extracted in this study ([Aerts et al., 2014](#)). We provided this information in previous studies ([Feng et al., 2018](#); [Zhao et al., 2020](#)). To maintain the integrity of this study, we also list it here.

### 1. Intensity features

**Table S1.** Intensity features describe the distribution of voxel intensities within an MRI image through commonly used and basic metrics. Because some intensity features have a close relationship with the voxel intensity, such as the maximum and mean, we first normalized those features by the image intensity using the min-max method in each center.

| Image feature                 | Equation                                                                                                                  | Definition                                                          |
|-------------------------------|---------------------------------------------------------------------------------------------------------------------------|---------------------------------------------------------------------|
| Energy                        | $\sum_{i=1}^N X(i)^2$                                                                                                     | Measure of the randomness of the intensity values in an image       |
| Entropy                       | $\sum_{i=1}^{N_i} P(i) \log_2 P(i)$                                                                                       | Represents the irregularity of the intensity value distribution     |
| Intensity features (14)       | $\frac{\frac{1}{N} \sum_{i=1}^N (X(i) - \bar{X})^4}{\left( \sqrt{\frac{1}{N} \sum_{i=1}^N (X(i) - \bar{X})^2} \right)^2}$ | The peakness of the histogram or indication of histogram flatness   |
| Maximum                       | Maximum intensity value of X                                                                                              |                                                                     |
| Mean                          | $\frac{1}{N} \sum_{i=1}^N X(i)$                                                                                           | Average intensity value of the pixels within the region of interest |
| Mean Absolute Deviation (mad) | Mean of the absolute deviations of all voxel intensities around the mean intensity value                                  | A measure of how much the gray levels differ from the mean          |

|                           |                                                                                                                         |                                                                          |
|---------------------------|-------------------------------------------------------------------------------------------------------------------------|--------------------------------------------------------------------------|
| Median                    | Median intensity value of X                                                                                             |                                                                          |
| Minimum                   | Minimum intensity value of X                                                                                            |                                                                          |
| Range                     | Range of intensity values of X                                                                                          |                                                                          |
| Root Mean Square<br>(RMS) | $\sqrt{\frac{\sum_i^N X(i)^2}{N}}$                                                                                      |                                                                          |
| Skewness                  | $\frac{\frac{1}{N} \sum_{i=1}^N (X(i) - \bar{X})^3}{\left(\sqrt{\frac{1}{N} \sum_{i=1}^N (X(i) - \bar{X})^2}\right)^3}$ | Symmetry of intensity values in an image                                 |
| Standard Deviation        | $\left(\frac{1}{N-1} \sum_{i=1}^N (X(i) - \bar{X})^2\right)^{1/2}$                                                      | A measure of how much variation or dispersion exists                     |
| Uniformity                | $\sum_{i=1}^{N_i} P(i)^2$                                                                                               | Measures the homogeneity of the intensity value distribution in an image |
| Variance (Var)            | $\frac{1}{N-1} \sum_{i=1}^N (X(i) - \bar{X})^2$                                                                         | The spread or variation around the mean (sum of squares)                 |

**X** denotes the three-dimensional image matrix. **N** is the number of voxels. **P** is the first-order histogram with **N<sub>i</sub>** discrete intensity levels.  $\bar{X}$  is the mean of X. The number of histogram bins is 100.

## 2. Textural features

**Table S2.** Textural features describe the patterns or spatial distribution of voxel intensities.

| Image feature           | Equation                                                                    | Definition                                                                                      |                                                                  |
|-------------------------|-----------------------------------------------------------------------------|-------------------------------------------------------------------------------------------------|------------------------------------------------------------------|
| Autocorrelation         | $\sum_{i=1}^{N_g} \sum_{j=1}^{N_g} ijP(i, j)$                               |                                                                                                 |                                                                  |
| Cluster Prominence (CP) | $\sum_{i=1}^{N_g} \sum_{j=1}^{N_g} [i + j - \mu_x(i) - \mu_y(j)]^4 P(i, j)$ |                                                                                                 |                                                                  |
| Cluster Shade           | $\sum_{i=1}^{N_g} \sum_{j=1}^{N_g} [i + j - \mu_x(i) - \mu_y(j)]^3 P(i, j)$ |                                                                                                 |                                                                  |
| Cluster Tendency        | $\sum_{i=1}^{N_g} \sum_{j=1}^{N_g} [i + j - \mu_x(i) - \mu_y(j)]^2 P(i, j)$ |                                                                                                 |                                                                  |
| Contrast                | $\sum_{i=1}^{N_g} \sum_{j=1}^{N_g}  i - j ^2 P(i, j)$                       | Measures the local variation in intensity values                                                |                                                                  |
| Textural features (33)  | Correlation                                                                 | $\frac{\sum_{i=1}^{N_g} \sum_{j=1}^{N_g} ijP(i, j) - \mu_x(i)\mu_y(j)}{\sigma_x(i)\sigma_y(j)}$ | Measures the linear dependencies of intensity values in an image |
| Difference Entropy      | $\sum_{i=0}^{N_g-1} P_{x-y}(i) \log_2 [P_{x-y}(i)]$                         |                                                                                                 |                                                                  |
| Dissimilarity           | $\sum_{i=1}^{N_g} \sum_{j=1}^{N_g}  i - j  P(i, j)$                         |                                                                                                 |                                                                  |
| Energy                  | $\sum_{i=1}^{N_g} \sum_{j=1}^{N_g} [P(i, j)]^2$                             |                                                                                                 |                                                                  |
| Entropy                 | $-\sum_{i=1}^{N_g} \sum_{j=1}^{N_g} P(i, j) \log_2 [P(i, j)]$               |                                                                                                 |                                                                  |
| Homogeneity1            | $\sum_{i=1}^{N_g} \sum_{j=1}^{N_g} \frac{P(i, j)}{1 +  i - j }$             | Measures the homogeneity of the intensity values                                                |                                                                  |

|                                               |                                                                                                                                      |                                                                    |
|-----------------------------------------------|--------------------------------------------------------------------------------------------------------------------------------------|--------------------------------------------------------------------|
| Homogeneity2                                  | $\sum_{i=1}^{N_g} \sum_{j=1}^{N_g} \frac{P(i,j)}{1 +  i - j ^2}$                                                                     | Measures the homogeneity of the intensity values of the pixel pair |
| Informational Measure of Correlation 1 (IMC1) | $\frac{HXY - HXY1}{\max\{HX, HY\}}$                                                                                                  |                                                                    |
| Informational Measure of Correlation 2 (IMC2) | $\sqrt{1 - e^{-2(HXY2 - HXY)}}$                                                                                                      |                                                                    |
| Inverse Difference Moment Normalized (IDMN)   | $\sum_{i=1}^{N_g} \sum_{j=1}^{N_g} \frac{P(i,j)}{1 + \left(\frac{ i-j ^2}{N^2}\right)}$                                              |                                                                    |
| Inverse Difference Normalized (IDN)           | $\sum_{i=1}^{N_g} \sum_{j=1}^{N_g} \frac{P(i,j)}{1 + \left(\frac{ i-j }{N}\right)}$                                                  |                                                                    |
| Inverse Variance                              | $\sum_{i=1}^{N_g} \sum_{j=1}^{N_g} \frac{P(i,j)}{ i-j ^2}, i \neq j$                                                                 |                                                                    |
| Maximum Probability                           | $\max\{P(i,j)\}$                                                                                                                     |                                                                    |
| Sum Average                                   | $\sum_{i=2}^{2N_g} [iP_{x+y}(i)]$                                                                                                    |                                                                    |
| Sum Entropy                                   | $-\sum_{i=2}^{2N_g} P_{x+y}(i) \log_2 [P_{x+y}(i)]$                                                                                  |                                                                    |
| Sum Variance                                  | $\sum_{i=2}^{2N_g} (i - SE)^2 P_{x+y}(i)$                                                                                            |                                                                    |
| Variance                                      | $\sum_{i=1}^{N_g} \sum_{j=1}^{N_g} (i - \mu)^2 P(i,j)$                                                                               |                                                                    |
| Short Run-Length Emphasis (SRE)               | $\frac{\sum_{i=1}^{N_g} \sum_{j=1}^{N_r} \left[ \frac{p(i,j \theta)}{j^2} \right]}{\sum_{i=1}^{N_g} \sum_{j=1}^{N_r} p(i,j \theta)}$ |                                                                    |
| Long Run-Length Emphasis (LRE)                | $\frac{\sum_{i=1}^{N_g} \sum_{j=1}^{N_r} j^2 p(i,j \theta)}{\sum_{i=1}^{N_g} \sum_{j=1}^{N_r} p(i,j \theta)}$                        |                                                                    |
| Gray-Level Nonuniformity (GLN)                | $\frac{\sum_{i=1}^{N_g} \left[ \sum_{j=1}^{N_r} p(i,j \theta) \right]^2}{\sum_{i=1}^{N_g} \sum_{j=1}^{N_r} p(i,j \theta)}$           | Represents the similarity of intensity values in an image          |

$P(i,j)$  is the co-occurrence matrix for an arbitrary  $\delta$  and  $\alpha$

$N_g$  is the number of discrete intensity levels in the image

$p(i,j|\theta)$  is the  $(i,j)$ th entry in the given run-length matrix  $p$  for a direction  $\theta$

$N_g$  is the number of discrete intensity values in the image

$N_r$  is the number of different run lengths

$N_p$  is the number of voxels in the image

$u$  is the mean of  $P(i, j)$

$p_x(i) = \sum_{j=1}^{N_g} P(i, j)$  is the marginal row probabilities

$p_y(i) = \sum_{i=1}^{N_g} P(i, j)$  is the marginal column probabilities

$\mu_x$  is the mean of  $p_x$

$\mu_y$  is the mean of  $p_y$

$\sigma_x$  is the standard deviation of  $p_x$

$\sigma_y$  is the standard deviation of  $p_y$

$p_{x+y}(k) = \sum_{i=1}^{N_g} \sum_{j=1}^{N_g} P(i, j), i+j=k, k=2, 3, \dots, 2*N_g$

$p_{x-y}(k) = \sum_{i=1}^{N_g} \sum_{j=1}^{N_g} P(i, j), |i-j|=k, k=0, 1, \dots, N_g - 1$

$H_X = - \sum_{i=1}^{N_g} p_x(i) \log_2[p_x(i)]$  is the entropy of  $p_x$

$H_Y = - \sum_{i=1}^{N_g} p_y(i) \log_2[p_y(i)]$  is the entropy of  $p_y$

$H = - \sum_{i=1}^{N_g} \sum_{j=1}^{N_g} P(i, j) \log_2[P(i, j)]$  is the entropy of  $P(i, j)$

$H_{XY1} = - \sum_{i=1}^{N_g} \sum_{j=1}^{N_g} P(i, j) \log(p_x(i)p_y(j))$

$H_{XY2} = - \sum_{i=1}^{N_g} \sum_{j=1}^{N_g} p_x(i)p_y(j) \log(p_x(i)p_y(j))$

## S02: Supplementary method for R2SN construction

We first performed a common min-max method to normalize the radiomics feature among different brain regions in individuals, and the redundancy feature was defined as those features that had a high correlation with other features ( $R > 0.9$ ). Briefly, we computed the correlation between the  $i$ th ( $i=1,2,\dots,47$ ) feature and the rest of the features, and the feature was redundant if an  $R$  value  $> 0.9$  appeared once or more. These superfluous features were removed before subsequent analysis. As a result, a final feature matrix of  $25 \times 90$  for each subject was obtained for further analysis (Table1). The detailed steps of the R2SN construction are shown in Figure S1.

For each regions:

Feature matrix (M) with 90 Brain regions\*47 Radiomics features

Feature matrix (M') with 90 Brain regions\*25 Radiomics features

after removing redundant features

$Net(i,j) = \text{Correlation}(M'(i,:), M'(j,:))$

$i=1,2,\dots,90; j=1,2,\dots,90$

**Figure S1.** The detailed steps of the R2SN construction.

### S03: Supplementary results for the replicability of the result in Brainnetome Atlas

Overall, a high consistency was found in any two mR2SNs that were constructed by different datasets (1000 times randomly simulation), and the Pearson coefficient ranged from 0.9997 to 1 (Figure S1b). In addition, a high consistency was also obtained by mR2SNs, which were constructed with different numbers of features (20 features for randomly selected and all features), and the R-value ranged from 0.90 to 1 (Figure S1c). More importantly, the R2SN achieved a high ICC value ( $ICC > 0.7$ ) within more than 95% of edges by test-retest analysis (Figure S1d).

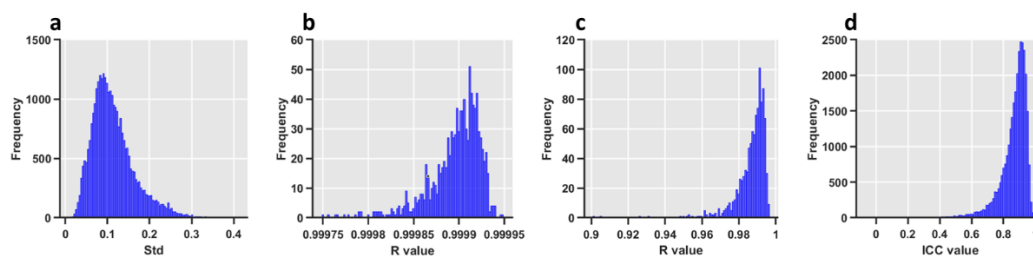

**Figure S2.** The stability and reliability of the R2SN. (a) The distribution of variance in the HCP dataset. (b) The distribution of the correlation coefficients of the R2SN network for each pair of two datasets (the HCP dataset was divided into 2 parts for 1000 random repetitions). (c) The distribution of the correlation coefficients of the R2SN network with 20 features (random selection of 20 features from 25 predefined features 1000 times) and the R2SN created with 25 features. (d) The ICC value of the R2SN with test-retest analysis.



The clustering coefficients, shortest path length, and sparseness are shown in Figure S2a-c. In addition, lambda ( $\lambda$ ) indicates the ratio of the shortest path length of R2SN and the random network, and gamma ( $\gamma$ ) indicates the ratio of the clustering coefficient of R2SN and the random network. As a result, the value of  $\lambda$  was close to 1 (Figure S2d), the value of  $\gamma$  was significantly larger than 1 (Figure S2e), and the small world index sigma ( $\sigma$ ) was also significantly larger than 1 by different thresholds of binarization (from 0.5 to 0.75, and the step size =0.01) (Figure S2f).

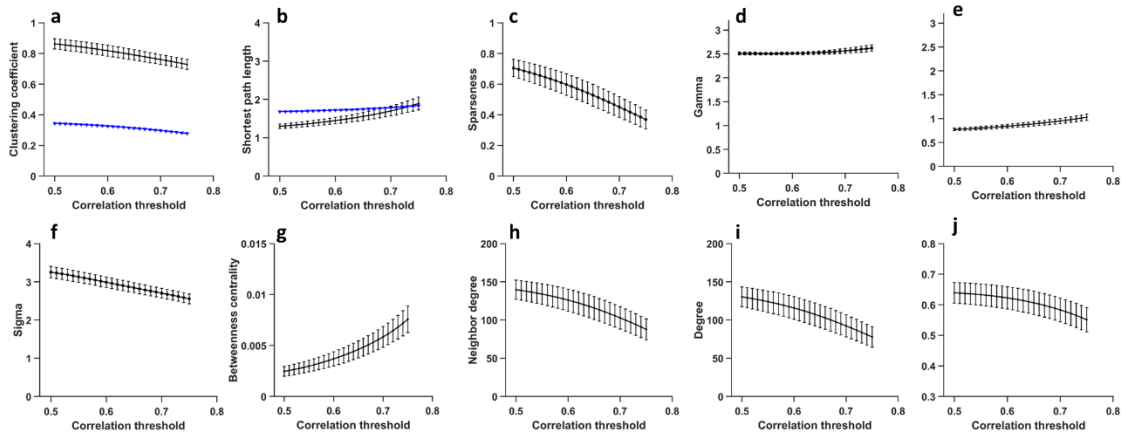

**Figure S3.** The network parameters of the R2SN with different correlation thresholds (0.5-0.75 and step size=0.01). (a) The clustering coefficient—“black” indicates the R2SN, and “blue” indicates the random network, (b) the shortest path length, (c) sparseness, and the small-world parameter, including (d) the gamma value (the ratio of clustering coefficients between R2SN and the random network), (e) the lambda value (the ratio of shortest path lengths between the R2SN and the random network), (f) the sigma value (the ratio of gamma and lambda), (g) the betweenness centrality value, (h) the neighbor degree value, (i) the degree value and (j) the global efficiency value.

To further explore the network structure, we also computed the hub nodes of the R2SN. In this study, the hub nodes were defined as those nodes that had many connections with other nodes. As Figure S4 shows, the hub nodes of the R2SN based on the AAL atlas were located mainly in the PrCG, SFGdor, ORBsup, MFG, ORBmid, IFGoperc, IFGtriang, SMA, CAL, CUN, SOG, PoCG, SMG, and HIP (Degree>10). Meanwhile, the hub nodes of the R2SN based on the BN atlas were located mainly in the A8m, A6m, A14m, A11m, A11m, A12\_47l, A12\_47l, A4tl, A6cvl, and A1\_2\_3tonLa. The PrCG, SFG, MFG, IFG and PoCG have been reported as the hub regions in previous studies ([He et al., 2007](#); [Tijms et al., 2012](#); [Kim et al., 2016](#)).

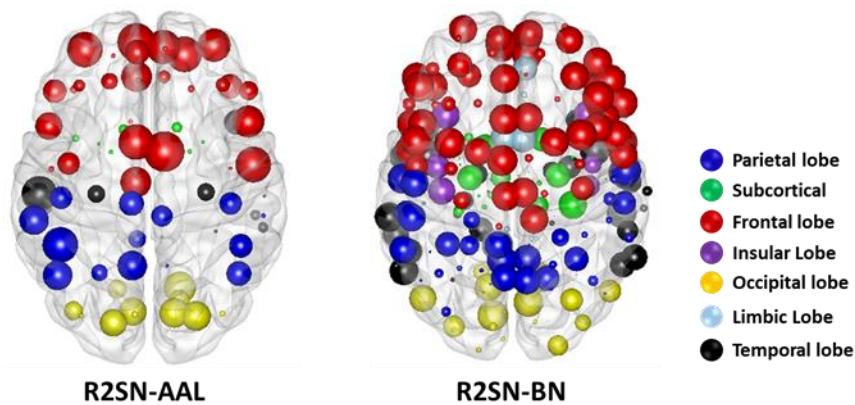

**Figure S4.** The hub nodes of the R2SN are based on the AAL atlas and BN atlas.

We also computed the correlation between the degree of the node and the cognitive score. PrCG, ORBsup, ORBmid, IFGoperc, SMA, CAL, CUN, SOG, PoCG, SMG, and HIP showed a significant correlation with the cognitive score. The hub regions are important for the connectome's efficiency and are preferentially affected by neurodegenerative disease ([Seidlitz et al., 2018](#)). These hub regions require more attention in future studies.

The mean connective strengths of each node of mR2SN and mGSN are shown in Figure S5a (mR2SN), Figure S5b (mGSN), and Figure S5c. We also computed the similarity between mR2SN and mGSN (edge-based measure), and the Euclidean distance between each pair of ROIs was employed as a concomitant variable. A significant correlation can be found between the two networks with  $R=0.25$  ( $P<0.001$ ), meaning that the brain region with high morphometric similarity also tended to have a high transcriptional similarity of the gene.

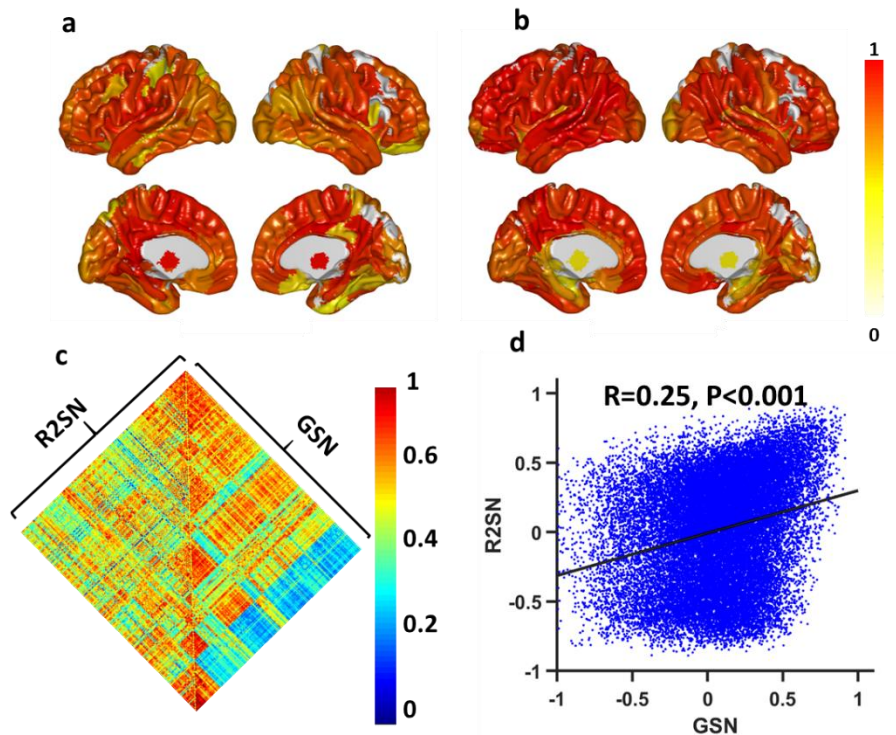

**Figure S5.** The correlation between the R2SN and the gene expression network. (a) The mean connective strength of the R2SN, which was mapped to the surface area from the Brainnetome Atlas. (b) The mean connective strength of the GSN, which was mapped to the surface area from the Brainnetome Atlas template. The value of the color bar was normalized with the max-min method. (c) The heat map for the R2SN and GSN. Some negative correlations were generated with the GSN, and this phenomenon might have been caused by the deletion of genes in some brain regions. (d) The scatter diagram of the correlation between GSN and R2SN, where the Euclidean distance between each pair of ROIs was employed as a concomitant variable within the network.

The Pearson correlation showed that approximately 1% of connections have a significant correlation with the fluid intelligence score (Bonferroni-corrected  $P < 0.05$ , with  $N = 30315$ ) (Figure S6a). As Figure S6 shows, the neighbor degree of 7 nodes (Figure S6b), degree of 39 nodes (Figure S6c), global efficiency of 82 nodes (Figure S6d) and clustering coefficient of 145 nodes (Figure S6e) were significantly correlated with fluid intelligence (Bonferroni-corrected  $P < 0.05$ , with  $N = 246$ ) (when threshold = 0.50). In addition, the neighbor degree of 0 nodes, degree of 15 nodes, global efficiency of 23 nodes and clustering coefficient of 13 nodes were significantly correlated with fluid intelligence (Bonferroni-corrected  $P < 0.01$ , with  $N = 246$ ) (when threshold = 0.50).

The Pearson correlation showed that approximately 9% of connections have a significant correlation with fluid intelligence score (Bonferroni-corrected  $P < 0.05$ , with  $N = 30315$ ) (Figure S6f). As Figure S6 shows, the neighbor degree of 59 nodes (Figure S6g), degree of 41 nodes (Figure S6h), global efficiency of 95 nodes (Figure S6i) and clustering coefficient of 198 nodes (Figure S6j) were significantly correlated with fluid intelligence (Bonferroni-corrected  $P < 0.001$ , with  $N = 246$ ) (when threshold = 0.50).

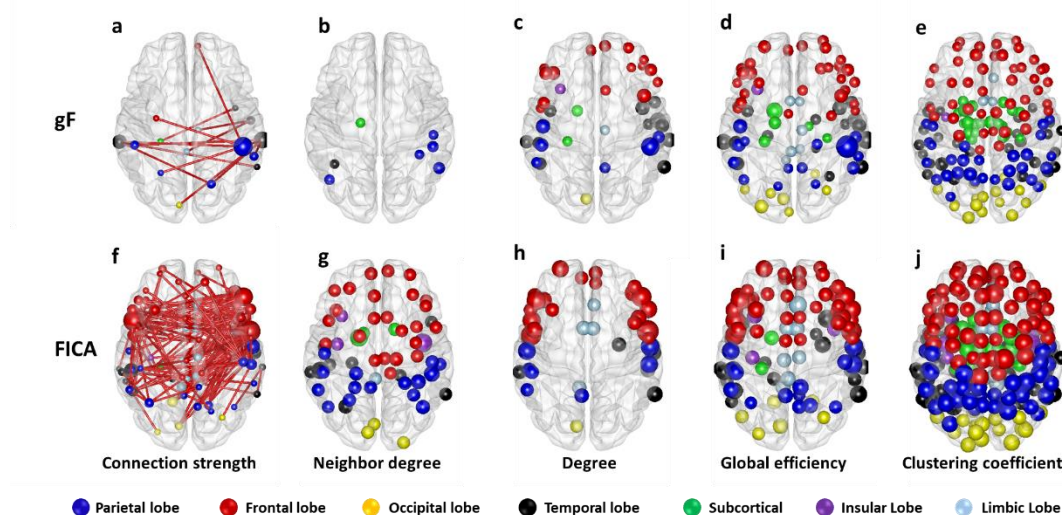

**Figure S6.** The correlation between R2SN and cognitive ability. (a) Connectivity showed a significant correlation with the individuals' fluid intelligence score (Bonferroni-corrected  $P < 0.001$ ), and the brain regions in which the (b) neighbor degree, (c) degree, (d) global efficiency and (e) clustering coefficient showed a significant association with the gF score (Bonferroni-corrected  $P < 0.05$ ). (f) Connectivity showed a significant correlation with the individuals' FICA score (Bonferroni-corrected  $P < 0.05$ ), and the brain regions in which the (b) neighbor degree, (c) degree, (d) global efficiency and (e) clustering coefficient showed a significant association with the FICA score (Bonferroni-corrected  $P < 0.05$ ).

FICA indicates the Flanker inhibitory control and attention test score, and gF indicates the fluid

intelligence.

We also computed the correlations between betweenness centrality/shortest path length and gF/FICA. However, weak significance was obtained as shown in Figure S7.

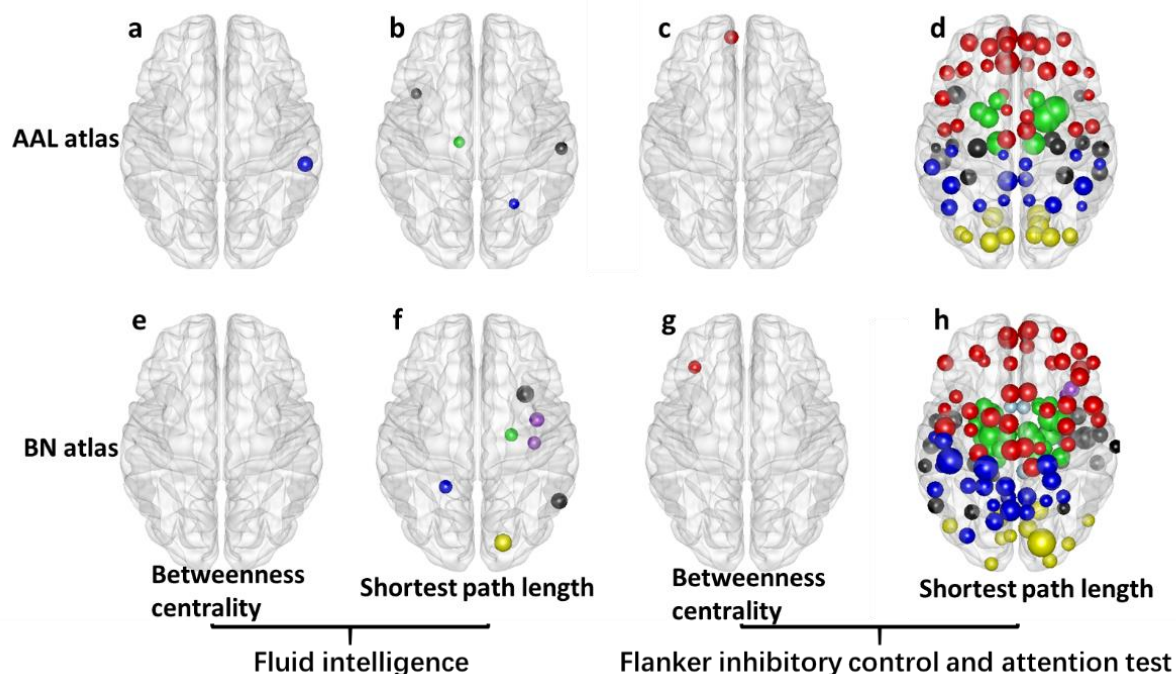

**Figure S7.** The correlation between R2SN and cognitive ability. The brain regions based on the AAL atlas in which (a) the between betweenness centrality and (b) the shortest path length showed a significant association with the gF score (Bonferroni-corrected  $P < 0.05$ ); the brain regions based on the AAL atlas in which (c) the between betweenness centrality and (d) the shortest path length showed a significant association with the FICA score (Bonferroni-corrected  $P < 0.05$ ). The brain regions based on the BN atlas in which (e) the between betweenness centrality and (f) the shortest path length showed a significant association with the gF score (Bonferroni-corrected  $P < 0.05$ ); and the brain regions based on the BN atlas in which (g) the between betweenness centrality and (h) the shortest path length showed a significant association with the FICA score (Bonferroni-corrected  $P < 0.05$ ).

**S04: Brain region names****Table S3.** The detailed brain region names of the AAL atlas (<https://www.gin.cnrs.fr/en/tools/aal/>).

| ID | Label       | Description          | ID | Label    | Description          |
|----|-------------|----------------------|----|----------|----------------------|
| 1  | PreCG_L     | Precentral_L         | 46 | CUN_R    | Cuneus_R             |
| 2  | PreCG_R     | Precentral_R         | 47 | LING_L   | Lingual_L            |
| 3  | SFGdor_L    | Frontal_Sup_L        | 48 | LING_R   | Lingual_R            |
| 4  | SFGdor_R    | Frontal_Sup_R        | 49 | SOG_L    | Occipital_Sup_L      |
| 5  | ORBsup_L    | Frontal_Sup_Orb_L    | 50 | SOG_R    | Occipital_Sup_R      |
| 6  | ORBsup_R    | Frontal_Sup_Orb_R    | 51 | MOG_L    | Occipital_Mid_L      |
| 7  | MFG_L       | Frontal_Mid_L        | 52 | MOG_R    | Occipital_Mid_R      |
| 8  | MFG_R       | Frontal_Mid_R        | 53 | IOG_L    | Occipital_Inf_L      |
| 9  | ORBmid_L    | Frontal_Mid_Orb_L    | 54 | IOG_R    | Occipital_Inf_R      |
| 10 | ORBmid_R    | Frontal_Mid_Orb_R    | 55 | FFG_L    | Fusiform_L           |
| 11 | IFGoperc_L  | Frontal_Inf_Oper_L   | 56 | FFG_R    | Fusiform_R           |
| 12 | IFGoperc_R  | Frontal_Inf_Oper_R   | 57 | PoCG_L   | Postcentral_L        |
| 13 | IFGtriang_L | Frontal_Inf_Tri_L    | 58 | PoCG_R   | Postcentral_R        |
| 14 | IFGtriang_R | Frontal_Inf_Tri_R    | 59 | SPG_L    | Parietal_Sup_L       |
| 15 | ORBin_L     | Frontal_Inf_Orb_L    | 60 | SPG_R    | Parietal_Sup_R       |
| 16 | ORBin_R     | Frontal_Inf_Orb_R    | 61 | IPL_L    | Parietal_Inf_L       |
| 17 | ROL_L       | Rolandic_Oper_L      | 62 | IPL_R    | Parietal_Inf_R       |
| 18 | ROL_R       | Rolandic_Oper_R      | 63 | SMG_L    | SupraMarginal_L      |
| 19 | SMA_L       | Supp_Motor_Area_L    | 64 | SMG_R    | SupraMarginal_R      |
| 20 | SMA_R       | Supp_Motor_Area_R    | 65 | ANG_L    | Angular_L            |
| 21 | OLF_L       | Olfactory_L          | 66 | ANG_R    | Angular_R            |
| 22 | OLF_R       | Olfactory_R          | 67 | PCUN_L   | Precuneus_L          |
| 23 | SFGmed_L    | Frontal_Sup_Medial_L | 68 | PCUN_R   | Precuneus_R          |
| 24 | SFGmed_R    | Frontal_Sup_Medial_R | 69 | PCL_L    | Paracentral_Lobule_L |
| 25 | ORBsubmed_L | Frontal_Med_Orb_L    | 70 | PCL_R    | Paracentral_Lobule_R |
| 26 | ORBsubmed_R | Frontal_Med_Orb_R    | 71 | CAU_L    | Caudate_L            |
| 27 | REC_L       | Rectus_L             | 72 | CAU_R    | Caudate_R            |
| 28 | REC_R       | Rectus_R             | 73 | PUT_L    | Putamen_L            |
| 29 | INS_L       | Insula_L             | 74 | PUT_R    | Putamen_R            |
| 30 | INS_R       | Insula_R             | 75 | PAL_L    | Pallidum_L           |
| 31 | ACG_L       | Cingulum_Ant_L       | 76 | PAL_R    | Pallidum_R           |
| 32 | ACG_R       | Cingulum_Ant_R       | 77 | THA_L    | Thalamus_L           |
| 33 | DCG_L       | Cingulum_Mid_L       | 78 | THA_R    | Thalamus_R           |
| 34 | DCG_R       | Cingulum_Mid_R       | 79 | HES_L    | Heschl_L             |
| 35 | PCG_L       | Cingulum_Post_L      | 80 | HES_R    | Heschl_R             |
| 36 | PCG_R       | Cingulum_Post_R      | 81 | STG_L    | Temporal_Sup_L       |
| 37 | HIP_L       | Hippocampus_L        | 82 | STG_R    | Temporal_Sup_R       |
| 38 | HIP_R       | Hippocampus_R        | 83 | TPOsup_L | Temporal_Pole_Sup_L  |
| 39 | PHG_L       | ParaHippocampal_L    | 84 | TPOsup_R | Temporal_Pole_Sup_R  |
| 40 | PHG_R       | ParaHippocampal_R    | 85 | MTG_L    | Temporal_Mid_L       |
| 41 | AMYG_L      | Amygdala_L           | 86 | MTG_R    | Temporal_Mid_R       |
| 42 | AMYG_R      | Amygdala_R           | 87 | TPOmid_L | Temporal_Pole_Mid_L  |
| 43 | CAL_L       | Calcarine_L          | 88 | TPOmid_R | Temporal_Pole_Mid_R  |
| 44 | CAL_R       | Calcarine_R          | 89 | ITG_L    | Temporal_Inf_L       |
| 45 | CUN_L       | Cuneus_L             | 90 | ITG_R    | Temporal_Inf_R       |

**Table S4.** The detailed brain region names of the BN atlas (<https://atlas.brainnetome.org/>).

| Lobe                    | Gyrus                        | Left and Right Hemisphere | Label | Label                                   | Anatomical and Modified Cyto-           |
|-------------------------|------------------------------|---------------------------|-------|-----------------------------------------|-----------------------------------------|
| Frontal Lobe            | SFG, Superior Frontal Gyrus  | SFG_L(R)_7_1              | 1     | 2                                       | A8m, medial area 8                      |
|                         |                              | SFG_L(R)_7_2              | 3     | 4                                       | A8dl, dorsolateral area 8               |
|                         |                              | SFG_L(R)_7_3              | 5     | 6                                       | A9l, lateral area 9                     |
|                         |                              | SFG_L(R)_7_4              | 7     | 8                                       | A6dl, dorsolateral area 6               |
|                         |                              | SFG_L(R)_7_5              | 9     | 10                                      | A6m, medial area 6                      |
|                         |                              | SFG_L(R)_7_6              | 11    | 12                                      | A9m,medial area 9                       |
|                         |                              | SFG_L(R)_7_7              | 13    | 14                                      | A10m, medial area 10                    |
|                         | MFG, Middle Frontal Gyrus    | MFG_L(R)_7_1              | 15    | 16                                      | A9/46d, dorsal area 9/46                |
|                         |                              | MFG_L(R)_7_2              | 17    | 18                                      | IFJ, inferior frontal junction          |
|                         |                              | MFG_L(R)_7_3              | 19    | 20                                      | A46, area 46                            |
|                         |                              | MFG_L(R)_7_4              | 21    | 22                                      | A9/46v, ventral area 9/46               |
|                         |                              | MFG_L(R)_7_5              | 23    | 24                                      | A8vl, ventrolateral area 8              |
|                         |                              | MFG_L(R)_7_6              | 25    | 26                                      | A6vl, ventrolateral area 6              |
|                         |                              | MFG_L(R)_7_7              | 27    | 28                                      | A10l, lateral area10                    |
|                         | IFG, Inferior Frontal Gyrus  | IFG_L(R)_6_1              | 29    | 30                                      | A44d,dorsal area 44                     |
|                         |                              | IFG_L(R)_6_2              | 31    | 32                                      | IFS, inferior frontal sulcus            |
|                         |                              | IFG_L(R)_6_3              | 33    | 34                                      | A45c, caudal area 45                    |
|                         |                              | IFG_L(R)_6_4              | 35    | 36                                      | A45r, rostral area 45                   |
|                         |                              | IFG_L(R)_6_5              | 37    | 38                                      | A44op, opercular area 44                |
|                         |                              | IFG_L(R)_6_6              | 39    | 40                                      | A44v, ventral area 44                   |
|                         | OrG, Orbital Gyrus           | OrG_L(R)_6_1              | 41    | 42                                      | A14m, medial area 14                    |
|                         |                              | OrG_L(R)_6_2              | 43    | 44                                      | A12/47o, orbital area 12/47             |
|                         |                              | OrG_L(R)_6_3              | 45    | 46                                      | A11l, lateral area 11                   |
|                         |                              | OrG_L(R)_6_4              | 47    | 48                                      | A11m, medial area 11                    |
|                         |                              | OrG_L(R)_6_5              | 49    | 50                                      | A13, area 13                            |
|                         |                              | OrG_L(R)_6_6              | 51    | 52                                      | A12/47l, lateral area 12/47             |
|                         | PrG, Precentral Gyrus        | PrG_L(R)_6_1              | 53    | 54                                      | A4hf, area 4(head and face region)      |
|                         |                              | PrG_L(R)_6_2              | 55    | 56                                      | A6cdl, caudal dorsolateral area 6       |
|                         |                              | PrG_L(R)_6_3              | 57    | 58                                      | A4ul, area 4 (upper limb region)        |
|                         |                              | PrG_L(R)_6_4              | 59    | 60                                      | A4t, area 4 (trunk region)              |
| PrG_L(R)_6_5            |                              | 61                        | 62    | A4tl, area 4 (tongue and larynx region) |                                         |
| PrG_L(R)_6_6            |                              | 63                        | 64    | A6cvl, caudal ventrolateral area 6      |                                         |
| PCL, Paracentral Lobule | PCL_L(R)_2_1                 | 65                        | 66    | A1/2/3ll, area1/2/3 (lower limb region) |                                         |
|                         | PCL_L(R)_2_2                 | 67                        | 68    | A4ll, area 4, (lower limb region)       |                                         |
| Temporal Lobe           | STG, Superior Temporal Gyrus | STG_L(R)_6_1              | 69    | 70                                      | A38m, medial area 38                    |
|                         |                              | STG_L(R)_6_2              | 71    | 72                                      | A41/42, area 41/42                      |
|                         |                              | STG_L(R)_6_3              | 73    | 74                                      | TE1.0 and TE1.2                         |
|                         |                              | STG_L(R)_6_4              | 75    | 76                                      | A22c, caudal area 22                    |
|                         |                              | STG_L(R)_6_5              | 77    | 78                                      | A38l, lateral area 38                   |
|                         |                              | STG_L(R)_6_6              | 79    | 80                                      | A22r, rostral area 22                   |
|                         | MTG, Middle Temporal Gyrus   | MTG_L(R)_4_1              | 81    | 82                                      | A21c, caudal area 21                    |
|                         |                              | MTG_L(R)_4_2              | 83    | 84                                      | A21r, rostral area 21                   |
|                         |                              | MTG_L(R)_4_3              | 85    | 86                                      | A37dl, dorsolateral area37              |
|                         |                              | MTG_L(R)_4_4              | 87    | 88                                      | aSTS, anterior superior temporal sulcus |
|                         | ITG, Inferior Temporal Gyrus | ITG_L(R)_7_1              | 89    | 90                                      | A20iv, intermediate ventral area 20     |
|                         |                              | ITG_L(R)_7_2              | 91    | 92                                      | A37elv, extreme lateroventral area37    |
|                         |                              | ITG_L(R)_7_3              | 93    | 94                                      | A20r, rostral area 20                   |
|                         |                              | ITG_L(R)_7_4              | 95    | 96                                      | A20il, intermediate lateral area 20     |
|                         |                              | ITG_L(R)_7_5              | 97    | 98                                      | A37vl, ventrolateral area 37            |
|                         |                              | ITG_L(R)_7_6              | 99    | 100                                     | A20cl, caudolateral of area 20          |
|                         |                              | ITG_L(R)_7_7              | 101   | 102                                     | A20cv, caudoventral of area 20          |
|                         | FuG, Fusiform Gyrus          | FuG_L(R)_3_1              | 103   | 104                                     | A20rv, rostroventral area 20            |
|                         |                              | FuG_L(R)_3_2              | 105   | 106                                     | A37mv, medioventral area37              |
|                         |                              | FuG_L(R)_3_3              | 107   | 108                                     | A37lv, lateroventral area37             |
|                         | PhG, Parahippocampal         | PhG_L(R)_6_1              | 109   | 110                                     | A35/36r, rostral area 35/36             |
|                         |                              | PhG_L(R)_6_2              | 111   | 112                                     | A35/36c, caudal area 35/36              |

|                               |                                      |                 |                                                 |                                           |                                                  |                                 |
|-------------------------------|--------------------------------------|-----------------|-------------------------------------------------|-------------------------------------------|--------------------------------------------------|---------------------------------|
| Parietal Lobe                 | Gyrus                                | PhG_L(R)_6_3    | 113                                             | 114                                       | <i>TL, area TL (lateral PPHC, posterior</i>      |                                 |
|                               |                                      | PhG_L(R)_6_4    | 115                                             | 116                                       | <i>A28/34, area 28/34 (EC, entorhinal</i>        |                                 |
|                               |                                      | PhG_L(R)_6_5    | 117                                             | 118                                       | <i>TI, area TI (temporal agranular insular</i>   |                                 |
|                               |                                      | PhG_L(R)_6_6    | 119                                             | 120                                       | <i>TH, area TH (medial PPHC)</i>                 |                                 |
|                               | pSTS, posterior Superior             | pSTS_L(R)_2_1   | 121                                             | 122                                       | <i>rpSTS, rostoposterior superior temporal</i>   |                                 |
|                               |                                      | pSTS_L(R)_2_2   | 123                                             | 124                                       | <i>cpSTS, caudoposterior superior temporal</i>   |                                 |
|                               | SPL, Superior Parietal Lobule        | SPL_L(R)_5_1    | SPL_L(R)_5_1                                    | 125                                       | 126                                              | <i>A7r, rostral area 7</i>      |
|                               |                                      |                 | SPL_L(R)_5_2                                    | 127                                       | 128                                              | <i>A7c, caudal area 7</i>       |
|                               |                                      |                 | SPL_L(R)_5_3                                    | 129                                       | 130                                              | <i>A5l, lateral area 5</i>      |
|                               |                                      |                 | SPL_L(R)_5_4                                    | 131                                       | 132                                              | <i>A7pc, postcentral area 7</i> |
| SPL_L(R)_5_5                  |                                      |                 | 133                                             | 134                                       | <i>A7ip, intraparietal area 7(hIP3)</i>          |                                 |
| IPL, Inferior Parietal Lobule |                                      | IPL_L(R)_6_1    | 135                                             | 136                                       | <i>A39c, caudal area 39(PGp)</i>                 |                                 |
|                               |                                      | IPL_L(R)_6_2    | 137                                             | 138                                       | <i>A39rd, rostrrodorsal area 39(Hip3)</i>        |                                 |
|                               |                                      | IPL_L(R)_6_3    | 139                                             | 140                                       | <i>A40rd, rostrrodorsal area 40(PFt)</i>         |                                 |
|                               |                                      | IPL_L(R)_6_4    | 141                                             | 142                                       | <i>A40c, caudal area 40 (PFm)</i>                |                                 |
|                               |                                      | IPL_L(R)_6_5    | 143                                             | 144                                       | <i>A39rv, rostroventral area 39 (PGa)</i>        |                                 |
| IPL_L(R)_6_6                  |                                      | IPL_L(R)_6_6    | 145                                             | 146                                       | <i>A40rv, rostroventral area 40 (PFop)</i>       |                                 |
|                               |                                      | Pcun, Precuneus | PCun_L(R)_4_1                                   | 147                                       | 148                                              | <i>A7m, medial area 7 (PEp)</i> |
|                               |                                      |                 | PCun_L(R)_4_2                                   | 149                                       | 150                                              | <i>A5m, medial area 5 (PEm)</i> |
| PCun_L(R)_4_3                 |                                      |                 | 151                                             | 152                                       | <i>dmPOS, dorsomedial parietooccipital</i>       |                                 |
| PCun_L(R)_4_4                 |                                      |                 | 153                                             | 154                                       | <i>A31, area 31 (Lc1)</i>                        |                                 |
| PoG, Postcentral Gyrus        |                                      | PoG_L(R)_4_1    | 155                                             | 156                                       | <i>A1/2/3ulhf, area 1/2/3(upper limb, head</i>   |                                 |
|                               | PoG_L(R)_4_2                         | 157             | 158                                             | <i>A1/2/3tonla, area 1/2/3(tongue and</i> |                                                  |                                 |
|                               | PoG_L(R)_4_3                         | 159             | 160                                             | <i>A2, area 2</i>                         |                                                  |                                 |
|                               | PoG_L(R)_4_4                         | 161             | 162                                             | <i>A1/2/3tru, area1/2/3(trunk region)</i> |                                                  |                                 |
| Insular Lobe                  | INS, Insular Gyrus                   | INS_L(R)_6_1    | 163                                             | 164                                       | <i>G, hypergranular insula</i>                   |                                 |
|                               |                                      | INS_L(R)_6_2    | 165                                             | 166                                       | <i>vla, ventral agranular insula</i>             |                                 |
|                               |                                      | INS_L(R)_6_3    | 167                                             | 168                                       | <i>dla, dorsal agranular insula</i>              |                                 |
|                               |                                      | INS_L(R)_6_4    | 169                                             | 170                                       | <i>vld/vlg, ventral dysgranular and granular</i> |                                 |
|                               |                                      | INS_L(R)_6_5    | 171                                             | 172                                       | <i>dlg, dorsal granular insula</i>               |                                 |
|                               |                                      | INS_L(R)_6_6    | 173                                             | 174                                       | <i>dld, dorsal dysgranular insula</i>            |                                 |
| Limbic Lobe                   | CG, Cingulate Gyrus                  | CG_L(R)_7_1     | 175                                             | 176                                       | <i>A23d, dorsal area 23</i>                      |                                 |
|                               |                                      | CG_L(R)_7_2     | 177                                             | 178                                       | <i>A24rv, rostroventral area 24</i>              |                                 |
|                               |                                      | CG_L(R)_7_3     | 179                                             | 180                                       | <i>A32p, pregenual area 32</i>                   |                                 |
|                               |                                      | CG_L(R)_7_4     | 181                                             | 182                                       | <i>A23v, ventral area 23</i>                     |                                 |
|                               |                                      | CG_L(R)_7_5     | 183                                             | 184                                       | <i>A24cd, caudodorsal area 24</i>                |                                 |
|                               |                                      | CG_L(R)_7_6     | 185                                             | 186                                       | <i>A23c, caudal area 23</i>                      |                                 |
|                               |                                      | CG_L(R)_7_7     | 187                                             | 188                                       | <i>A32sg, subgenual area 32</i>                  |                                 |
| Occipital Lobe                | MVOcC, MedioVentral Occipital Cortex | MVOcC_L(R)_5_1  | 189                                             | 190                                       | <i>cLinG, caudal lingual gyrus</i>               |                                 |
|                               |                                      | MVOcC_L(R)_5_2  | 191                                             | 192                                       | <i>rCunG, rostral cuneus gyrus</i>               |                                 |
|                               |                                      | MVOcC_L(R)_5_3  | 193                                             | 194                                       | <i>cCunG, caudal cuneus gyrus</i>                |                                 |
|                               |                                      | MVOcC_L(R)_5_4  | 195                                             | 196                                       | <i>rLinG, rostral lingual gyrus</i>              |                                 |
|                               |                                      | MVOcC_L(R)_5_5  | 197                                             | 198                                       | <i>vmPOS, ventromedial parietooccipital</i>      |                                 |
|                               | LOcC, lateral Occipital Cortex       | LOcC_L(R)_4_1   | 199                                             | 200                                       | <i>mOccG, middle occipital gyrus</i>             |                                 |
|                               |                                      | LOcC_L(R)_4_2   | 201                                             | 202                                       | <i>V5/MT+, area V5/MT+</i>                       |                                 |
|                               |                                      | LOcC_L(R)_4_3   | 203                                             | 204                                       | <i>OPC, occipital polar cortex</i>               |                                 |
|                               |                                      | LOcC_L(R)_4_4   | 205                                             | 206                                       | <i>iOccG, inferior occipital gyrus</i>           |                                 |
|                               |                                      | LOcC_L(R)_2_1   | 207                                             | 208                                       | <i>msOccG, medial superior occipital gyrus</i>   |                                 |
| LOcC_L(R)_2_2                 | 209                                  | 210             | <i>lsOccG, lateral superior occipital gyrus</i> |                                           |                                                  |                                 |
| Subcortical Nuclei            | Amyg, Amygdala                       | Amyg_L(R)_2_1   | 211                                             | 212                                       | <i>mAmyg, medial amygdala</i>                    |                                 |
|                               |                                      | Amyg_L(R)_2_2   | 213                                             | 214                                       | <i>lAmyg, lateral amygdala</i>                   |                                 |
|                               | Hipp, Hippocampus                    | Hipp_L(R)_2_1   | 215                                             | 216                                       | <i>rHipp, rostral hippocampus</i>                |                                 |
|                               |                                      | Hipp_L(R)_2_2   | 217                                             | 218                                       | <i>cHipp, caudal hippocampus</i>                 |                                 |
|                               | BG, Basal Ganglia                    | BG_L(R)_6_1     | 219                                             | 220                                       | <i>vCa, ventral caudate</i>                      |                                 |
|                               |                                      | BG_L(R)_6_2     | 221                                             | 222                                       | <i>GP, globus pallidus</i>                       |                                 |
|                               |                                      | BG_L(R)_6_3     | 223                                             | 224                                       | <i>NAC, nucleus accumbens</i>                    |                                 |
|                               |                                      | BG_L(R)_6_4     | 225                                             | 226                                       | <i>vmPu, ventromedial putamen</i>                |                                 |
|                               |                                      | BG_L(R)_6_5     | 227                                             | 228                                       | <i>dCa, dorsal caudate</i>                       |                                 |
|                               |                                      | BG_L(R)_6_6     | 229                                             | 230                                       | <i>dIPu, dorsolateral putamen</i>                |                                 |
|                               | Tha, Thalamus                        | Tha_L(R)_8_1    | 231                                             | 232                                       | <i>mPFtha, medial prefrontal thalamus</i>        |                                 |
|                               |                                      | Tha_L(R)_8_2    | 233                                             | 234                                       | <i>mPMtha, premotor thalamus</i>                 |                                 |



## Supplementary materials

|  |  |              |     |     |                                            |
|--|--|--------------|-----|-----|--------------------------------------------|
|  |  | Tha_L(R)_8_3 | 235 | 236 | <i>Stha, sensory thalamus</i>              |
|  |  | Tha_L(R)_8_4 | 237 | 238 | <i>rTtha, rostral temporal thalamus</i>    |
|  |  | Tha_L(R)_8_5 | 239 | 240 | <i>PPtha, posterior parietal thalamus</i>  |
|  |  | Tha_L(R)_8_6 | 241 | 242 | <i>Otha, occipital thalamus</i>            |
|  |  | Tha_L(R)_8_7 | 243 | 244 | <i>cTtha, caudal temporal thalamus</i>     |
|  |  | Tha_L(R)_8_8 | 245 | 246 | <i>IPFtha, lateral prefrontal thalamus</i> |

## References

- Aerts HJ, Velazquez ER, Leijenaar RT, Parmar C, Grossmann P, Carvalho S, *et al.* Decoding tumour phenotype by noninvasive imaging using a quantitative radiomics approach. *Nat Commun* 2014; 5: 4006.
- Feng F, Wang P, Zhao K, Zhou B, Yao H, Meng Q, *et al.* Radiomic Features of Hippocampal Subregions in Alzheimer's Disease and Amnesic Mild Cognitive Impairment. *Front Aging Neurosci* 2018; 10: 290.
- He Y, Chen ZJ, Evans AC. Small-world anatomical networks in the human brain revealed by cortical thickness from MRI. *Cereb Cortex* 2007; 17(10): 2407-19.
- Kim HJ, Shin JH, Han CE, Kim HJ, Na DL, Seo SW, *et al.* Using Individualized Brain Network for Analyzing Structural Covariance of the Cerebral Cortex in Alzheimer's Patients. *Front Neurosci* 2016; 10: 394.
- Seidlitz J, Vasa F, Shinn M, Romero-Garcia R, Whitaker KJ, Vertes PE, *et al.* Morphometric Similarity Networks Detect Microscale Cortical Organization and Predict Inter-Individual Cognitive Variation. *Neuron* 2018; 97(1): 231-47 e7.
- Tijms BM, Series P, Willshaw DJ, Lawrie SM. Similarity-based extraction of individual networks from gray matter MRI scans. *Cereb Cortex* 2012; 22(7): 1530-41.
- Zhao K, Ding YH, Han Y, Fan Y, Alexander-Bloch AF, Han T, *et al.* Independent and reproducible hippocampal radiomic biomarkers for multisite Alzheimer's disease: diagnosis, longitudinal progress and biological basis. *Science Bulletin* 2020; 65(13): 1103-13.
